# Supplementary material for: Mix and match: Patchwork domain evolution of the land plant-specific Ca2+-permeable mechanosensitive channel MCA
Source: PubMed Central journal article supplement (PMC8049495; doi:10.1371/journal.pone.0249735), 2021-04-15

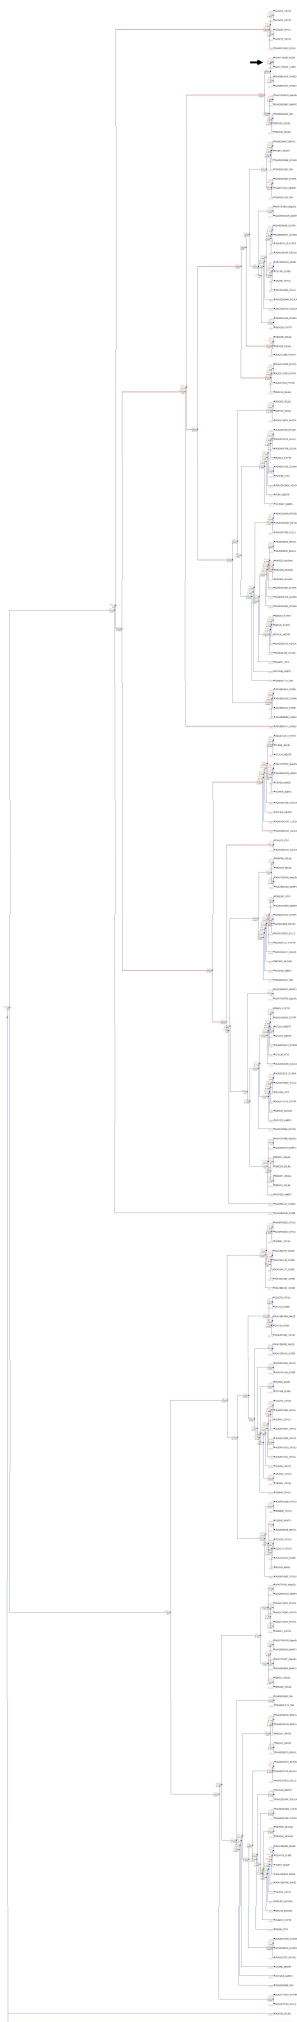

Supplement: pone.0249735.s010.pdf [file pone.0249735.s010.pdf]
