# Supplementary material for: Mix and match: Patchwork domain evolution of the land plant-specific Ca2+-permeable mechanosensitive channel MCA
Source: PubMed Central journal article supplement (PMC8049495; doi:10.1371/journal.pone.0249735), 2021-04-15

**S11 Appendix. MCA<sup>func</sup> domain ML tree.** (a) Clade associated with E3 ubiquitin ligase AtPUB13. (b) Clade associated with AtPUB45. (c) MCA<sup>func</sup> only proteins. (d) Clade associated with AtARO3 and monocot U-box containing protein kinase like proteins. (e) MCA clade associated with AtMCA1 and AtMCA2

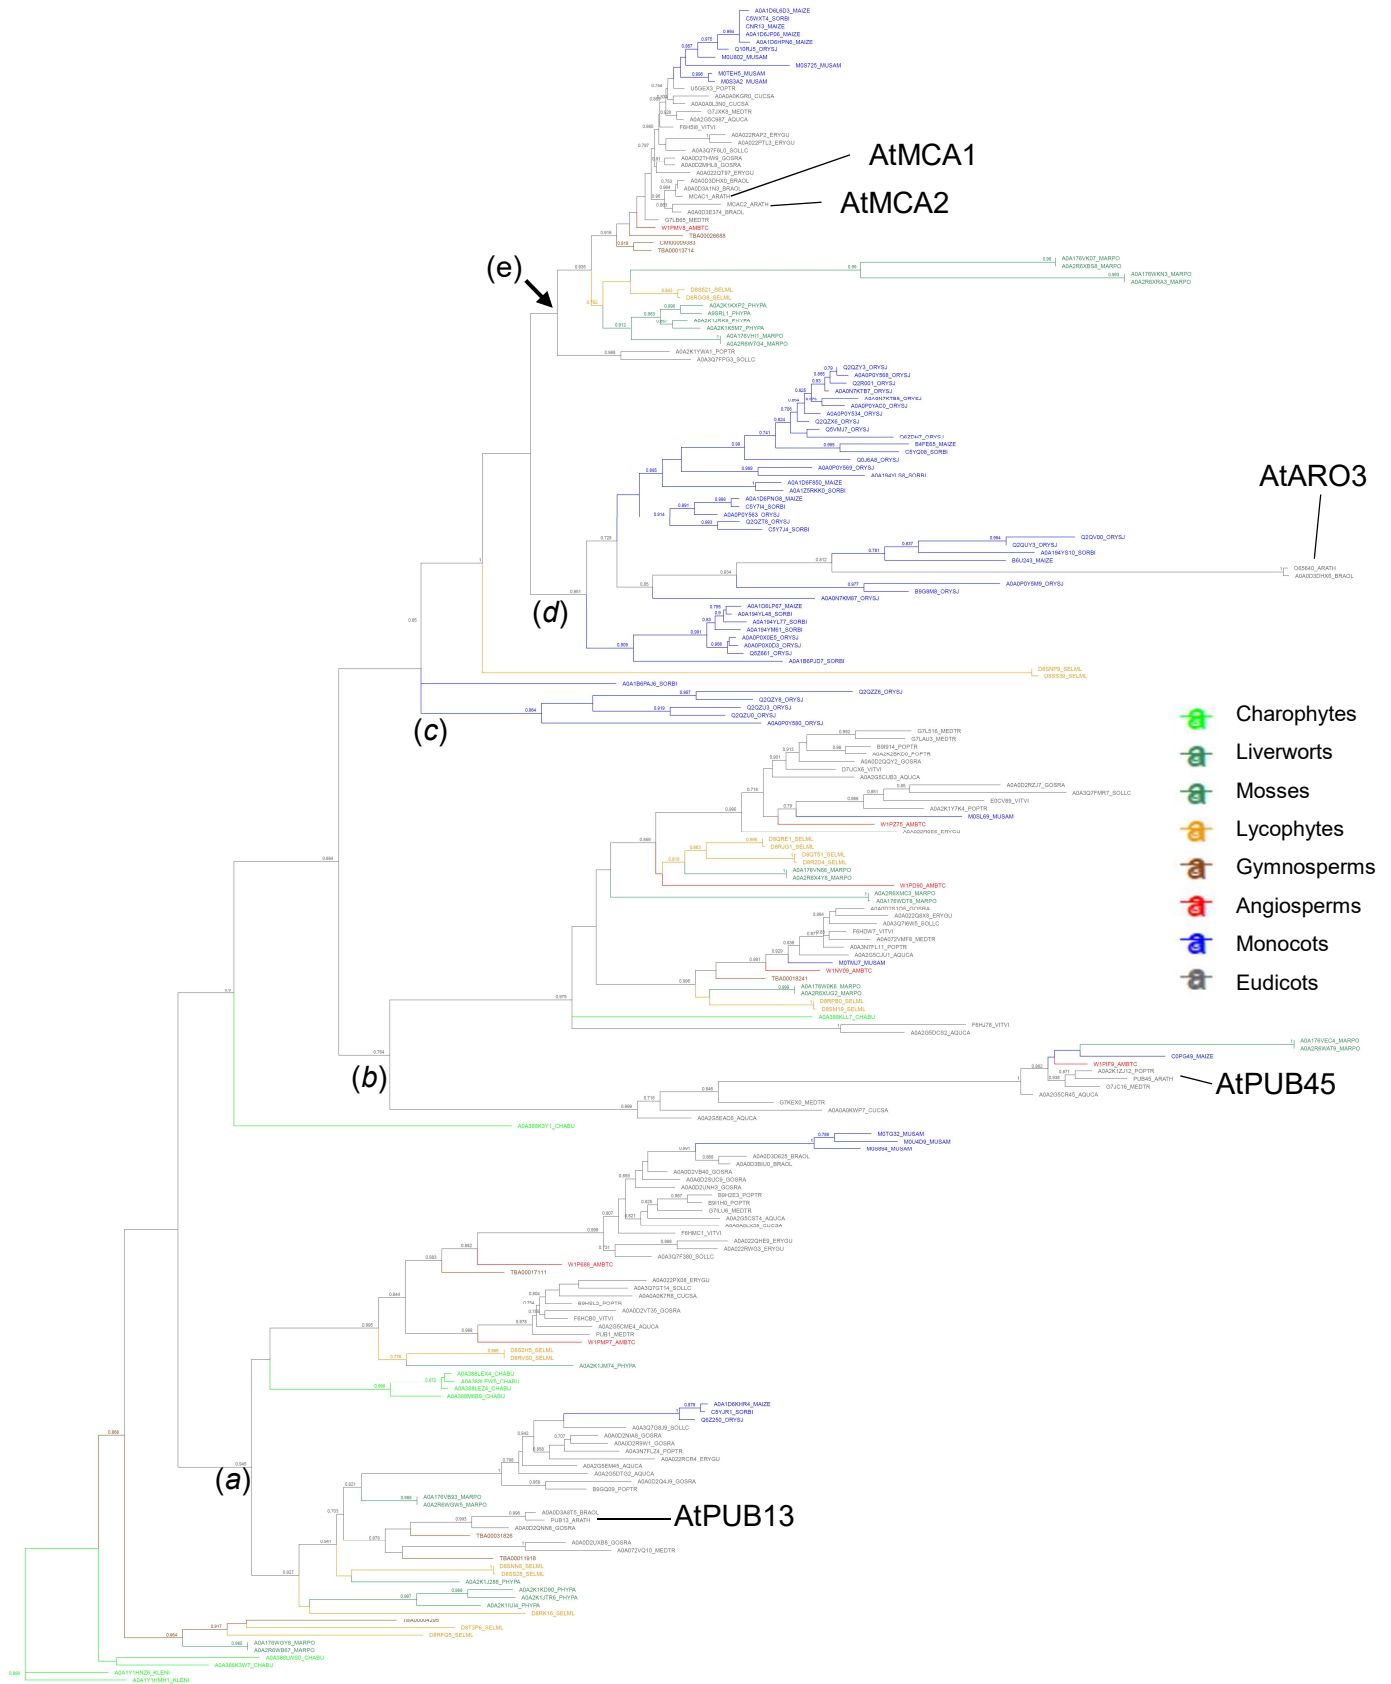

Supplement: pone.0249735.s011.pdf [file pone.0249735.s011.pdf]
