# Supplementary material for: Mix and match: Patchwork domain evolution of the land plant-specific Ca2+-permeable mechanosensitive channel MCA
Source: PubMed Central journal article supplement (PMC8049495; doi:10.1371/journal.pone.0249735), 2021-04-15

S12 Appendix. Result of the Notung rooting analysis of the PLAC8 domain tree. Multiple branches show equally strong estimates as possible root positions (marked in red)

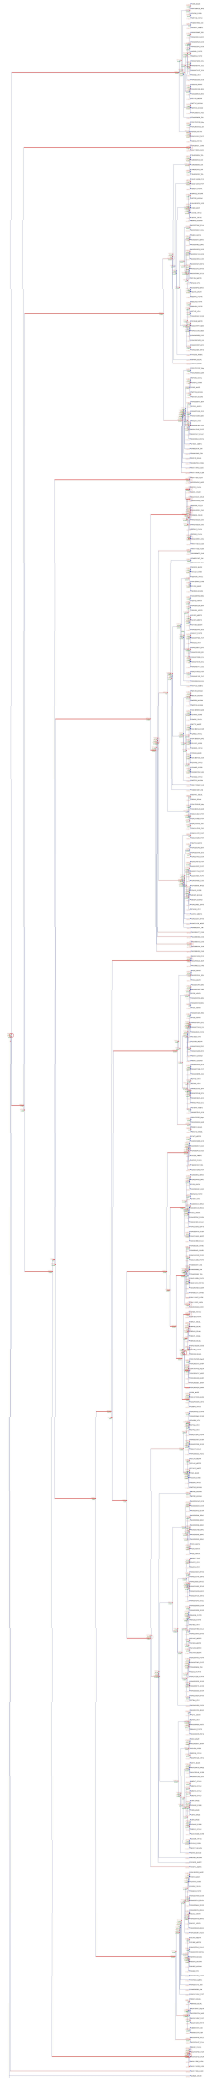

Supplement: pone.0249735.s012.pdf [file pone.0249735.s012.pdf]
