# Supplementary material for: Mix and match: Patchwork domain evolution of the land plant-specific Ca2+-permeable mechanosensitive channel MCA
Source: PubMed Central journal article supplement (PMC8049495; doi:10.1371/journal.pone.0249735), 2021-04-15

**S17 Appendix. Domain partners of PLAC8 domain.** Domain partners observed in the PLAC8 domain containing proteins associated with the ML tree (left). Domain individual *E* values (i.Evalue) resulting from HMMER website searches are shown as heatmap (right). Absence of domains indicated in grey

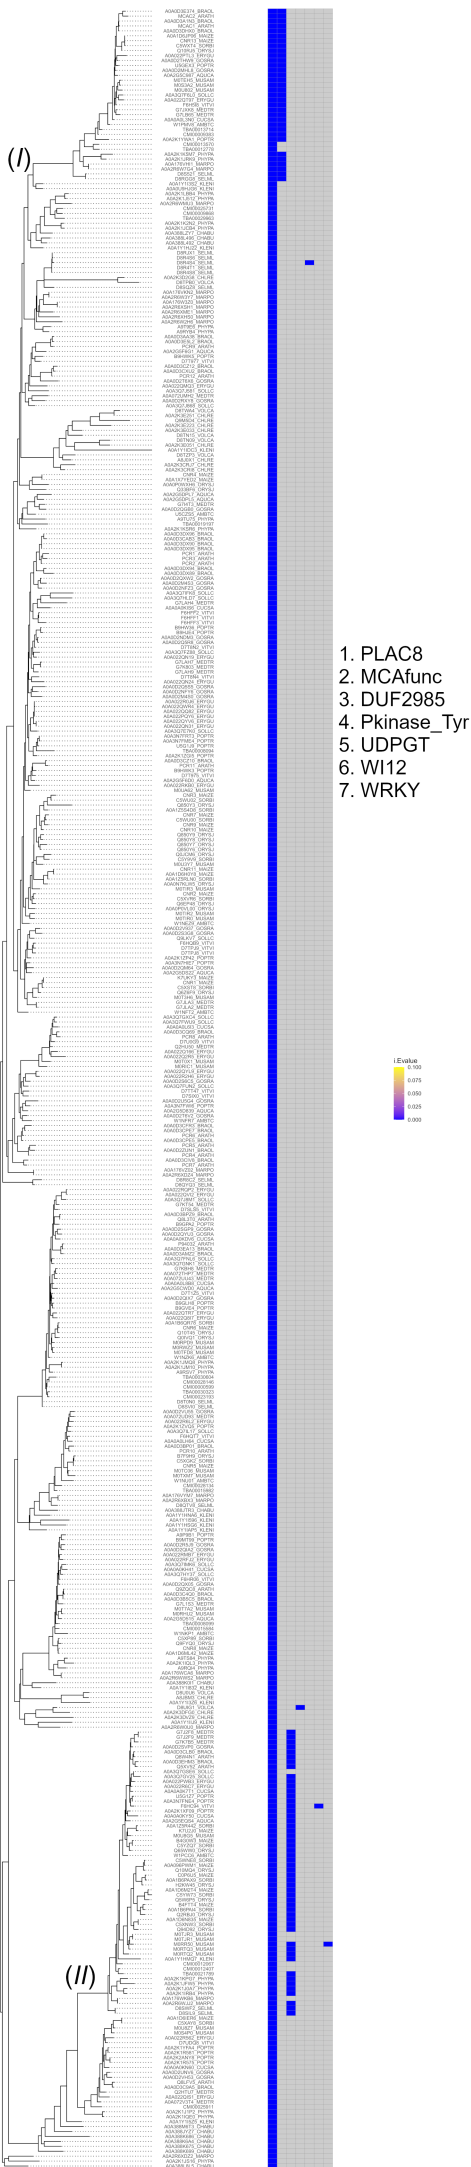

Supplement: pone.0249735.s017.pdf [file pone.0249735.s017.pdf]
